# Supplementary material for: Retrospective comparison of traditional and artificial intelligence-based heart failure phenotyping in a US health system to enable real-world evidence
Source: PubMed Central journal article supplement — BMJ Open. 2023 Aug 9;13(8):e073178. doi: 10.1136/bmjopen-2023-073178 (PMC10414071; doi:10.1136/bmjopen-2023-073178), 2023-08-09
Supplement: bmjopen-2023-073178supp002.pdf [file bmjopen-2023-073178supp002.pdf]

Supplementary Table 1. Cohort identification of heart failure diagnoses, left ventricular ejection fraction, heart failure medications, symptoms, and comorbid cardiovascular conditions

|                       | Traditional approach |                  |                         | Advanced approach |              |                         | Concept occurrence | Encounter occurrence | P-value          |
|-----------------------|----------------------|------------------|-------------------------|-------------------|--------------|-------------------------|--------------------|----------------------|------------------|
|                       | Recall, %            | Precision, %     | F <sub>1</sub> score, % | Recall, %         | Precision, % | F <sub>1</sub> score, % |                    |                      |                  |
| <b>HF diagnosis</b>   |                      |                  |                         |                   |              |                         |                    |                      |                  |
| HF                    | 46.9                 | 95.4             | 62.9                    | 96.0              | 94.7         | 95.3                    | 265                | 155                  | <0.001           |
| HFrEF                 | 0                    | N/A*             | N/A <sup>†</sup>        | 94.8              | 100.0        | 97.3                    | 382                | 124                  | N/A <sup>§</sup> |
| HFmrEF                | 0                    | N/A*             | N/A <sup>†</sup>        | 80.4              | 100.0        | 89.2                    | 62                 | 35                   | N/A <sup>§</sup> |
| HFpEF                 | 0                    | N/A*             | N/A <sup>†</sup>        | 83.5              | 100.0        | 91.0                    | 103                | 55                   | N/A <sup>§</sup> |
| <b>LVEF</b>           | N/A <sup>‡</sup>     | N/A <sup>‡</sup> | N/A <sup>‡</sup>        | 93.7              | 100.0        | 96.7                    | 677                | 238                  | N/A <sup>§</sup> |
| <b>HF medications</b> |                      |                  |                         |                   |              |                         |                    |                      |                  |
| Carvedilol            | 95.1                 | 100.0            | 97.5                    | 99.7              | 99.7         | 99.7                    | 407                | 141                  | <0.001           |
| Furosemide            | 87.7                 | 100.0            | 93.4                    | 99.3              | 99.8         | 99.5                    | 1572               | 371                  | 0.116            |
| Lisinopril            | 83.9                 | 100.0            | 91.2                    | 99.7              | 99.9         | 99.8                    | 1068               | 386                  | <0.001           |
| Metoprolol            | 92.2                 | 100.0            | 95.9                    | 97.7              | 100.0        | 98.8                    | 1370               | 397                  | <0.001           |
| <b>Symptoms</b>       |                      |                  |                         |                   |              |                         |                    |                      |                  |

|                                           |      |       |                  |      |       |      |      |     |                  |
|-------------------------------------------|------|-------|------------------|------|-------|------|------|-----|------------------|
| Angina                                    | 7.8  | 60.0  | 13.8             | 84.4 | 82.3  | 83.3 | 265  | 155 | <0.001           |
| Chest pain                                | 21.4 | 70.8  | 32.9             | 95.4 | 86.1  | 90.5 | 2332 | 756 | <0.001           |
| Dyspnea                                   | 12.7 | 78.2  | 21.9             | 94.7 | 92.0  | 93.3 | 4474 | 832 | <0.001           |
| Fatigue                                   | 1.4  | 75.0  | 2.8              | 96.5 | 94.5  | 95.5 | 1711 | 371 | <0.001           |
| Palpitation                               | 8.2  | 52.9  | 14.2             | 90.9 | 82.6  | 86.6 | 896  | 493 | <0.001           |
| <b>Comorbid cardiovascular conditions</b> |      |       |                  |      |       |      |      |     |                  |
| Atrial fibrillation                       | 72.2 | 98.7  | 83.4             | 93.0 | 98.7  | 95.8 | 1214 | 222 | <0.001           |
| Aortic regurgitation                      | 19.4 | 100.0 | 32.5             | 92.5 | 100.0 | 96.1 | 153  | 90  | <0.001           |
| Mitral regurgitation                      | 13.5 | 97.1  | 23.8             | 92.8 | 99.6  | 96.1 | 483  | 185 | <0.001           |
| Myocardial infarction                     | 21.1 | 90.9  | 34.3             | 95.5 | 83.4  | 89.0 | 1220 | 578 | <0.001           |
| Tricuspid regurgitation                   | 0    | N/A*  | N/A <sup>†</sup> | 92.2 | 100.0 | 95.9 | 162  | 78  | N/A <sup>§</sup> |

\*These elements did not occur when using the traditional approach. <sup>†</sup>F<sub>1</sub> scores could not be calculated due to a lack of data for precision. <sup>‡</sup>Structured data recall is not applicable for ejection fraction because there was no code available within the problem list. <sup>§</sup>P-value could not be calculated due to the unavailability of F<sub>1</sub> scores for the traditional approach. P-values are derived from the chi-square test.

HF, heart failure; HFmrEF, heart failure with mildly reduced ejection fraction; HFpEF, heart failure with preserved ejection fraction; HFrEF, heart failure with reduced ejection fraction; LVEF, left ventricular ejection fraction; N/A, not applicable.
